# Supplementary material for: A Standardized Extract of Microalgae Phaeodactylum tricornutum (Mi136) Inhibit D-Gal Induced Cognitive Dysfunction in Mice
Source: MDPI journal article supplement (doi:10.3390/md22030099), 2024-02-21
Supplement: s1 [file s1]

Supplementary material

**Table S1.** Raw data on behavioral tests in blank control group (BC) : Y-maze test ; Passive avoidance test and Morris water maze test.

Abbreviations: ALT (Alternation) ; STL (Step through latency) ; EL (Escape Latency) ; Lat (Latency) ; Med (Median) ; Tg (Target quadrant)

| #Gp | # Mouse | Y-MAZE |     |       |        |       | STPA Task |      | MORRIS WATER MAZE TEST |      |        |      |      |      |        |      |      |      |        |      |      |      |        |      |      |      |            |       |
|-----|---------|--------|-----|-------|--------|-------|-----------|------|------------------------|------|--------|------|------|------|--------|------|------|------|--------|------|------|------|--------|------|------|------|------------|-------|
|     |         | LOC    | ALT | %ALT  | STL    | EL    | DAY 01    |      |                        |      | DAY 02 |      |      |      | DAY 03 |      |      |      | DAY 04 |      |      |      | DAY 05 |      |      |      | Probe test |       |
|     |         |        |     |       |        |       | Lat1      | Lat2 | Lat3                   | Med  | Lat1   | Lat2 | Lat3 | Med  | Lat1   | Lat2 | Lat3 | Med  | Lat1   | Lat2 | Lat3 | Med  | Lat1   | Lat2 | Lat3 | Med  | Tg         | Other |
| BC  | 617-B1  | 33     | 25  | 80,6  | 179    | 37    | 66        | 59   | 90                     | 66   | 63     | 90   | 24   | 63   | 90     | 38   | 26   | 38   | 90     | 27   | 19   | 27   | 24     | 13   | 39   | 24   | 40,2       | 19,9  |
|     | 617-B2  | 27     | 19  | 76,0  | 226    | 8     | 90        | 90   | 90                     | 90   | 90     | 68   | 53   | 68   | 36     | 13   | 84   | 36   | 90     | 30   | 34   | 34   | 10     | 77   | 15   | 15   | 53,9       | 15,4  |
|     | 617-B3  | 37     | 29  | 82,9  | 300    | 14    | 90        | 90   | 58                     | 90   | 56     | 90   | 55   | 56   | 90     | 28   | 41   | 41   | 39     | 45   | 18   | 39   | 7      | 8    | 90   | 8    | 36,4       | 21,2  |
|     | 617-B4  | 34     | 13  | 40,6  | 213    | 39    | 59        | 67   | 90                     | 67   | 27     | 90   | 49   | 49   | 26     | 90   | 10   | 26   | 90     | 26   | 13   | 26   | 17     | 75   | 20   | 20   | 51,5       | 16,2  |
|     | 617-B5  | 34     | 21  | 65,6  | 300    | 27    | 90        | 75   | 90                     | 90   | 68     | 70   | 90   | 70   | 15     | 90   | 29   | 29   | 6      | 90   | 15   | 15   | 90     | 29   | 13   | 29   | 53,1       | 15,6  |
|     | 617-B6  | 33     | 15  | 48,4  | 300    | 12    | 90        | 90   | 74                     | 90   | 62     | 90   | 52   | 62   | 78     | 30   | 23   | 30   | 30     | 15   | 90   | 30   | 90     | 11   | 12   | 12   | 54,5       | 15,2  |
|     | 617-J1  | 29     | 20  | 74,1  | 300    | 22    | 90        | 90   | 47                     | 90   | 65     | 90   | 14   | 65   | 36     | 90   | 9    | 36   | 90     | 26   | 8    | 26   | 35     | 27   | 21   | 27   | 43         | 19    |
|     | 617-J2  | 33     | 22  | 71,0  | 224    | 15    | 62        | 90   | 39                     | 62   | 90     | 59   | 39   | 59   | 90     | 44   | 27   | 44   | 30     | 90   | 27   | 30   | 17     | 90   | 35   | 35   | 46,3       | 17,9  |
|     | 617-J3  | 37     | 23  | 65,7  | 300    | 19    | 90        | 47   | 90                     | 90   | 90     | 27   | 47   | 47   | 90     | 10   | 30   | 30   | 90     | 19   | 12   | 19   | 10     | 77   | 6    | 10   | 42,1       | 19,3  |
|     | 617-J4  | 34     | 21  | 65,6  | 237    | 7     | 90        | 69   | 51                     | 69   | 62     | 60   | 56   | 60   | 42     | 32   | 90   | 42   | 90     | 40   | 47   | 47   | 90     | 8    | 5    | 8    | 40,4       | 19,9  |
|     | 617-J5  | 31     | 22  | 75,9  | 300    | 36    | 90        | 53   | 90                     | 90   | 90     | 70   | 34   | 70   | 27     | 54   | 90   | 54   | 20     | 23   | 90   | 23   | 90     | 14   | 16   | 16   | 32,2       | 22,6  |
|     | 617-J6  | 30     | 18  | 64,3  | 201    | 14    | 90        | 90   | 90                     | 90   | 90     | 29   | 49   | 49   | 90     | 15   | 48   | 48   | 36     | 34   | 90   | 36   | 13     | 10   | 80   | 13   | 42,4       | 19,2  |
|     | Mean    | 33     | 21  | 67,56 | 256,67 | 20,83 | 83,1      | 75,8 | 74,9                   | 82   | 71,1   | 69,4 | 46,8 | 59,8 | 59,2   | 44,5 | 42,3 | 37,8 | 58,4   | 38,8 | 38,6 | 29,3 | 41,1   | 36,6 | 29,3 | 18,1 | 44,7       | 18,44 |
|     | SD      | 3      | 4,2 | 12,48 | 47,385 | 11,38 | 12,6      | 16,4 | 20,3                   | 11,9 | 19,6   | 22,9 | 18,9 | 8,14 | 31     | 30,2 | 29,7 | 8,41 | 34     | 25,3 | 32,8 | 8,8  | 36,9   | 32,8 | 28   | 8,89 | 7,25       | 2,418 |

**Table S2.** Raw data on behavioral tests in negative control group (NC) : Y-maze test ; Passive avoidance test and Morris water maze test.

Abbreviations: ALT (Alternation) ; STL (Step through latency) ; EL (Escape Latency) ; Lat (Latency) ; Med (Median) ; Tg (Target quadrant)

| #Gp | # Mouse | Y-MAZE |     |       |        |       | STPA Task |      | MORRIS WATER MAZE TEST |      |        |      |      |      |        |      |      |      |        |      |      |      |        |      |      |      |            |       |      |
|-----|---------|--------|-----|-------|--------|-------|-----------|------|------------------------|------|--------|------|------|------|--------|------|------|------|--------|------|------|------|--------|------|------|------|------------|-------|------|
|     |         | LOC    | ALT | %ALT  | STL    | EL    | DAY 01    |      |                        |      | DAY 02 |      |      |      | DAY 03 |      |      |      | DAY 04 |      |      |      | DAY 05 |      |      |      | Probe test |       |      |
|     |         |        |     |       |        |       | Lat1      | Lat2 | Lat3                   | Med  | Lat1   | Lat2 | Lat3 | Med  | Lat1   | Lat2 | Lat3 | Med  | Lat1   | Lat2 | Lat3 | Med  | Lat1   | Lat2 | Lat3 | Med  | Tg         | Other |      |
| NC  | 617-D1  | 35     | 10  | 30,3  | 108    | 68    | 90        | 90   | 90                     | 90   | 88     | 90   | 43   | 88   | 90     | 77   | 48   | 77   | 90     | 66   | 23   | 66   | 63     | 84   | 13   | 63   | 18,2       | 27,3  |      |
|     | 617-D2  | 29     | 10  | 37,0  | 79     | 77    | 90        | 90   | 63                     | 90   | 54     | 90   | 36   | 54   | 56     | 90   | 44   | 56   | 47     | 90   | 15   | 47   | 22     | 41   | 90   | 41   | 26,3       | 24,6  |      |
|     | 617-D3  | 32     | 12  | 40,0  | 147    | 124   | 59        | 47   | 90                     | 59   | 90     | 70   | 26   | 70   | 90     | 37   | 49   | 49   | 36     | 59   | 90   | 59   | 38     | 90   | 8    | 38   | 30,2       | 23,3  |      |
|     | 617-D4  | 29     | 15  | 55,6  | 136    | 82    | 90        | 66   | 90                     | 90   | 90     | 90   | 90   | 90   | 67     | 65   | 67   | 54   | 90     | 62   | 62   | 90   | 15     | 27   | 27   | 32,4 | 22,5       |       |      |
|     | 617-D5  | 38     | 17  | 47,2  | 84     | 108   | 90        | 90   | 90                     | 90   | 90     | 90   | 27   | 90   | 59     | 90   | 24   | 59   | 90     | 38   | 42   | 42   | 90     | 75   | 19   | 75   | 18,5       | 27,2  |      |
|     | 617-D6  | 31     | 11  | 37,9  | 190    | 94    | 90        | 54   | 74                     | 74   | 69     | 90   | 73   | 73   | 63     | 90   | 70   | 70   | 59     | 90   | 90   | 90   | 90     | 90   | 90   | 90   | 90         | 29,6  | 23,5 |
|     | 617-L1  | 35     | 14  | 42,4  | 124    | 79    | 37        | 59   | 90                     | 59   | 66     | 37   | 90   | 66   | 90     | 66   | 17   | 66   | 66     | 90   | 13   | 66   | 90     | 62   | 51   | 62   | 17,3       | 27,6  |      |
|     | 617-L2  |        |     |       |        |       |           |      |                        |      |        |      |      |      |        |      |      |      |        |      |      |      |        |      |      |      |            |       |      |
|     | 617-L3  | 32     | 11  | 36,7  | 109    | 87    | 90        | 47   | 66                     | 66   | 90     | 59   | 19   | 59   | 75     | 90   | 39   | 75   | 90     | 59   | 22   | 59   | 36     | 90   | 24   | 36   | 35         | 21,7  |      |
|     | 617-L4  | 28     | 12  | 46,2  | 86     | 130   | 90        | 90   | 51                     | 90   | 90     | 90   | 90   | 90   | 90     | 84   | 90   | 90   | 44     | 90   | 19   | 44   | 90     | 49   | 17   | 49   | 22,3       | 25,9  |      |
|     | 617-L5  | 34     | 14  | 43,8  | 137    | 75    | 90        | 90   | 90                     | 90   | 90     | 90   | 90   | 90   | 40     | 36   | 40   | 40   | 63     | 90   | 63   | 51   | 67     | 38   | 51   | 16,7 | 27,8       |       |      |
|     | 617-L6  | 30     | 10  | 35,7  | 172    | 69    | 48        | 70   | 90                     | 70   | 65     | 46   | 90   | 65   | 90     | 60   | 27   | 60   | 36     | 90   | 37   | 37   | 22     | 90   | 39   | 39   | 21,2       | 26,3  |      |
|     | Mean    | 32     | 12  | 41,16 | 124,73 | 90,27 | 78,5      | 72,1 | 80,4                   | 78,9 | 80,2   | 76,5 | 61,3 | 75,9 | 80,3   | 71,9 | 46,3 | 64,5 | 59,3   | 75   | 45,7 | 57,7 | 62     | 68,5 | 37,8 | 51,9 | 24,3       | 25,22 |      |
|     | SD      | 3,1    | 2,3 | 6,883 | 36,119 | 21,47 | 20,2      | 18,4 | 14,4                   | 13,4 | 13,7   | 20,3 | 30,7 | 14   | 14,2   | 19,8 | 21,7 | 13,9 | 21,8   | 18,6 | 31,7 | 14,9 | 29,1   | 24,8 | 28,7 | 18,9 | 6,62       | 2,207 |      |

**Table S3.** Raw data on behavioral tests in BP120 group : Y-maze test ; Passive avoidance test and Morris water maze test.

Abbreviations: ALT (Alternation) ; STL (Step through latency) ; EL (Escape Latency) ; Lat (Latency) ; Med (Median) ; Tg (Target quadrant)

| #Gp   | # Mouse | Y-MAZE |     |       |        |       | STPA Task |      | MORRIS WATER MAZE TEST |      |        |      |      |      |        |      |      |      |        |      |      |      |        |      |      |      |            |       |
|-------|---------|--------|-----|-------|--------|-------|-----------|------|------------------------|------|--------|------|------|------|--------|------|------|------|--------|------|------|------|--------|------|------|------|------------|-------|
|       |         | LOC    | ALT | %ALT  | STL    | EL    | DAY 01    |      |                        |      | DAY 02 |      |      |      | DAY 03 |      |      |      | DAY 04 |      |      |      | DAY 05 |      |      |      | Probe test |       |
|       |         |        |     |       |        |       | Lat1      | Lat2 | Lat3                   | Med  | Lat1   | Lat2 | Lat3 | Med  | Lat1   | Lat2 | Lat3 | Med  | Lat1   | Lat2 | Lat3 | Med  | Lat1   | Lat2 | Lat3 | Med  | Tg         | Other |
| BP120 | 617-F1  | 32     | 17  | 56,7  | 187    | 74    | 90        | 90   | 90                     | 90   | 90     | 84   | 29   | 84   | 90     | 55   | 24   | 55   | 90     | 40   | 17   | 40   | 90     | 47   | 14   | 47   | 37,5       | 20,8  |
|       | 617-F2  | 31     | 19  | 65,5  | 235    | 39    | 90        | 90   | 90                     | 90   | 67     | 90   | 40   | 67   | 48     | 37   | 90   | 48   | 37     | 90   | 13   | 37   | 38     | 90   | 18   | 38   | 37,9       | 20,7  |
|       | 617-F3  | 37     | 20  | 57,1  | 174    | 26    | 75        | 40   | 90                     | 75   | 54     | 59   | 90   | 59   | 10     | 37   | 90   | 37   | 90     | 28   | 19   | 28   | 90     | 51   | 21   | 51   | 48,7       | 17,1  |
|       | 617-F4  | 29     | 14  | 51,9  | 159    | 47    | 90        | 90   | 59                     | 90   | 36     | 90   | 73   | 73   | 90     | 22   | 39   | 39   | 90     | 22   | 50   | 50   | 13     | 75   | 29   | 29   | 47,5       | 17,5  |
|       | 617-F5  | 33     | 19  | 61,3  | 242    | 31    | 90        | 90   | 63                     | 90   | 90     | 75   | 74   | 75   | 52     | 75   | 19   | 52   | 60     | 40   | 30   | 40   | 22     | 34   | 90   | 34   | 29         | 23,7  |
|       | 617-F6  | 31     | 18  | 62,1  | 207    | 60    | 24        | 90   | 41                     | 41   | 90     | 29   | 70   | 70   | 90     | 27   | 30   | 30   | 22     | 54   | 10   | 22   | 42     | 90   | 18   | 42   | 27,8       | 24,1  |
|       | 617-N1  | 28     | 14  | 53,8  | 224    | 47    | 90        | 90   | 90                     | 90   | 90     | 74   | 70   | 74   | 90     | 50   | 27   | 50   | 90     | 47   | 42   | 47   | 90     | 36   | 24   | 36   | 35,3       | 21,6  |
|       | 617-N2  | 35     | 19  | 57,6  | 256    | 36    | 90        | 90   | 90                     | 90   | 39     | 90   | 27   | 39   | 44     | 90   | 15   | 44   | 38     | 90   | 30   | 38   | 41     | 90   | 19   | 41   | 49,2       | 16,9  |
|       | 617-N3  | 31     | 15  | 51,7  | 170    | 51    | 90        | 55   | 69                     | 69   | 34     | 65   | 90   | 65   | 90     | 39   | 28   | 39   | 90     | 51   | 40   | 51   | 15     | 29   | 56   | 29   | 38,8       | 20,4  |
|       | 617-N4  | 38     | 19  | 52,8  | 197    | 43    | 90        | 90   | 77                     | 90   | 56     | 45   | 90   | 56   | 90     | 90   | 32   | 90   | 90     | 24   | 26   | 26   | 90     | 22   | 37   | 37   | 40,2       | 19,9  |
|       | 617-N5  |        |     |       |        |       |           |      |                        |      |        |      |      |      |        |      |      |      |        |      |      |      |        |      |      |      |            |       |
|       | 617-N6  | 33     | 18  | 58,1  | 200    | 29    | 90        | 39   | 46                     | 46   | 90     | 27   | 79   | 79   | 52     | 90   | 41   | 52   | 40     | 19   | 90   | 40   | 18     | 7    | 90   | 18   | 43         | 19    |
|       | Mean    | 33     | 17  | 57,14 | 204,64 | 43,91 | 82,6      | 77,6 | 73,2                   | 78,3 | 66,9   | 66,2 | 66,5 | 67,4 | 67,8   | 55,6 | 39,5 | 48,7 | 67     | 45,9 | 33,4 | 38,1 | 49,9   | 51,9 | 37,8 | 36,5 | 39,5       | 20,15 |
|       | SD      | 3,1    | 2,2 | 4,474 | 31,541 | 14,25 | 20        | 21,6 | 18,8                   | 18,7 | 24     | 23,6 | 23,7 | 12,5 | 27,8   | 26,2 | 26,1 | 15,7 | 27,8   | 24,8 | 22,6 | 9,52 | 33,3   | 29,9 | 28,3 | 9,14 | 7,26       | 2,42  |
